# Supplementary material for: Generating a robust prediction model for stage I lung adenocarcinoma recurrence after surgical resection
Source: PubMed Central journal article supplement (PMC5668084; doi:10.18632/oncotarget.19161), 2017-07-11
Supplement: oncotarget-08-79712-s001.pdf [file oncotarget-08-79712-s001.pdf]

## **Generating a robust prediction model for stage I lung adenocarcinoma recurrence after surgical resection**

### **SUPPLEMENTARY MATERIALS**

**Supplementary-GeneList:** See\_Supplementary-GeneList.
